# Supplementary material for: A promising electrochemical sensor based on PVP-induced shape control of a hydrothermally synthesized layered structured vanadium disulfide for the sensitive detection of a sulfamethoxazole antibiotic
Source: Royal Society of Chemistry journal article supplement (doi:10.1039/d3an01355c), 2023-11-07
Supplement: d3an01355c1.pdf [file d3an01355c1.pdf]

## A promising electrochemical sensor based on PVP-induced shape control of hydrothermal synthesizing layered structured vanadium disulfide for the sensitive detection of sulfamethoxazole antibiotic

Mingjiao Shi,<sup>a,b</sup> Peizheng Shi,<sup>b</sup> Xinxin Yang,<sup>a</sup> Ningbin Zhao,<sup>b</sup> Mengfan Wu,<sup>b</sup> Jing Li,<sup>c</sup> Chen Ye,<sup>b,d,e</sup> He Li,<sup>b,d,e</sup> Nan Jiang,<sup>b,d,e</sup> Xiufen Li,<sup>f</sup> Guosong Lai,<sup>g</sup> Wan-Feng Xie,<sup>h</sup> Li Fu,<sup>i</sup> Gang Wang,<sup>j</sup> Yangguang Zhu,<sup>\*b,f</sup> Hsu-Sheng Tsai,<sup>\*c,k</sup> Cheng-Te Lin,<sup>\*b,d,e</sup>

a School of Materials Science and Engineering, Shanghai University, Shanghai, 200072, P.R. China

b Qianwan Institute, Ningbo Institute of Materials Technology and Engineering (NIMTE), Chinese Academy of Sciences, Ningbo 315201, China

c School of Physics, Harbin Institute of Technology, 150001, Harbin, China

d Center of Materials Science and Optoelectronics Engineering, University of Chinese Academy of Sciences, Beijing 100049, China

e Key Laboratory of Marine Materials and Related Technologies, Zhejiang Key Laboratory of Marine Materials and Protective Technologies, Ningbo Institute of Materials Technology and Engineering (NIMTE), Chinese Academy of Sciences, Ningbo 315201, China

f Laboratory of Environmental Biotechnology, School of Environmental and Civil Engineering, Jiangnan University, Wuxi, 214122, China

g Hubei Key Laboratory of Pollutant Analysis & Reuse Technology, College of Chemistry and Chemical Engineering, Hubei Normal University, Huangshi, 435002, China

h College of Electronics and Information, University-Industry Joint Center for Ocean Observation and Broadband Communication, Qingdao University, Qingdao, 266071, China

i College of Materials and Environmental Engineering, Hangzhou Dianzi University, Hangzhou 310018, China

j Department of Microelectronic Science and Engineering, School of Physical Science and Technology, Ningbo University, Ningbo, 315211, China

k Laboratory for Space Environment and Physical Sciences, Harbin Institute of Technology, 150001, Harbin, China

\* Correspondence: zhuyanguang@nimte.ac.cn (Y.G. Zhu); hstai@hit.edu.cn (H.-S. Tsai); linzhengde@nimte.ac.cn (C.-T. Lin)

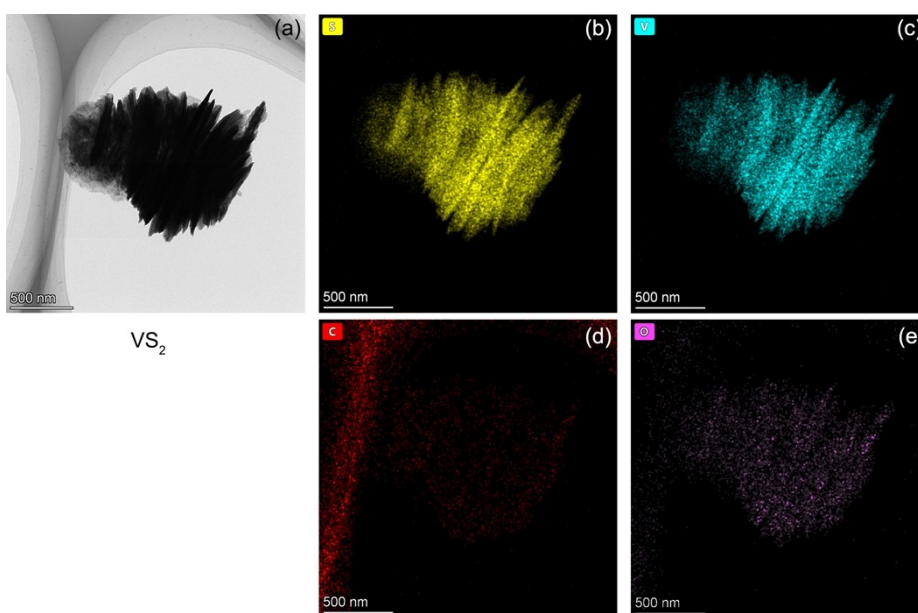

Fig. S1. (a) TEM image of  $\text{VS}_2$ . (b-d) TEM elemental mapping of S, V, C and O.

Table S1. The element composition of VS<sub>2</sub>.

| Element | Atomic fraction (%) | Mass fraction (%) |
|---------|---------------------|-------------------|
| S       | 67.90               | 59.66             |
| V       | 27.66               | 38.62             |
| C       | 2.02                | 0.66              |
| O       | 2.41                | 1.06              |

The parameters  $R_s$ ,  $R_c$ ,  $Q_{dl}$ ,  $Q_c$ , and  $Z_W$  represent solution resistance, internal resistance, interface double layer capacitance, coating capacitance, and Warburg impedance, respectively. The parameter fitting values of the equivalent circuit model are shown in Table S2.

Table S2. The fitting parameters of Nyquist plots for various modified electrodes

| Electrodes      | $R_s$<br>( $\Omega$ ) | $\gamma_0, Q_{dl}$<br>( $S \cdot sec^n \cdot 10^{-6}$ ) | n   | $R_{ct}$<br>( $\Omega$ ) | $\gamma_0, Q_c$<br>( $S \cdot sec^n \cdot 10^{-3}$ ) | n   | $R_c$<br>( $\Omega$ ) | $\gamma_0, Z_W$<br>( $S \cdot sec^5 \cdot 10^{-8}$ ) |
|-----------------|-----------------------|---------------------------------------------------------|-----|--------------------------|------------------------------------------------------|-----|-----------------------|------------------------------------------------------|
| *GCE            | 179.0                 | 2.9                                                     | 0.9 | 5079                     | -                                                    | -   | -                     | 36000                                                |
| rGO             | 181.9                 | 337.0                                                   | 0.8 | 621.5                    | 5.1                                                  | 1.0 | 254.8                 | 45530                                                |
| CNTs            | 162.6                 | 3.3                                                     | 0.8 | 628.3                    | 1.8                                                  | 0.4 | 954.8                 | 5.0                                                  |
| VS <sub>2</sub> | 159.6                 | 5.0                                                     | 0.8 | 567.2                    | 3.0                                                  | 0.5 | 1839                  | 2.3                                                  |

\* Equivalent circuit model of GCE is fitted as  $R_s(Q_{dl}(R_{ct}Z_W))$ .

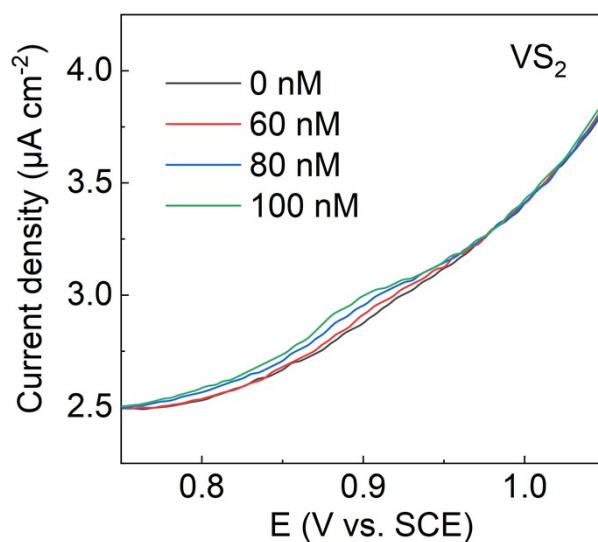Fig. S2. DPV tests of VS<sub>2</sub> electrodes with SMX concentrations as 0, 60, 80 and 100 nM.

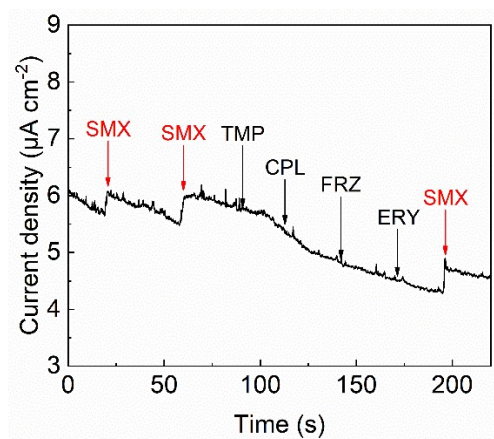

Fig. S3. The anti-interference of VS<sub>2</sub> electrodes towards other types of antibiotics existed in real water samples.

Table S3. Recovery results of CIP in real water samples by using rGO/PEI/TiO<sub>2</sub>/Apt electrodes

| Sample      | Added (µM) | Founded (µM) | RSD (%) | Recovery (%) |
|-------------|------------|--------------|---------|--------------|
| River water | 0.6        | 0.64         | 1.32    | 106.77       |
|             | 1.5        | 1.58         | 1.67    | 105.58       |
|             | 3          | 3.15         | 1.56    | 105.09       |
|             | 4.5        | 4.49         | 1.79    | 99.74        |
|             | 6          | 5.84         | 1.16    | 97.41        |
